# Supplementary material
Source: bioRxiv or medRxiv preprint supplement (https://www.biorxiv.org/highwire/filestream/37101/field_highwire_adjunct_files/0/126375-1.pdf)
Supplement: Supplementary file [file 126375-1.pdf]

**Supplemental File for**

**Title:** Mupirocin-associated temporal changes in the nasal microbiota and host's antimicrobial responses: A pilot study in healthy staphylococcal carriers

**Authors:**

Su-Hsun Liu, Yi-Ching Tang, Yi-Hsiung Lin, Kuan-Fu Chen, Chih-Jung Chen, Yhu-Chering Huang, Leslie Y Chen

**Content:**

Section 1. Definitions for ecological metrics used in the current study

Section 2. Supplementary Tables S1-S5

Section 3. Supplementary Figures S1-S4

## SECTION 1. Ecological metrics used in the current study

The current study used the following community richness, diversity, and evenness measures as described by Gotelli and Colwell (Chapter 4) and by Maurer and McGill (Chapter 5) in [1]; all calculations were cross-verified using separate R packages.[2, 3]

1-1. The observed number (S) is the total number of species (OTUs) actually observed.

1-2. Chao1 index for abundance data is defined as  $S + \frac{f_1^2}{2f_2}$ , where  $f_1$  and  $f_2$  is the relative abundance for singletons and doubletons, respectively.

1-3. Shannon diversity ( $D_{Shannon}$ ) was estimated by  $-\sum p_i \ln p_i$  where  $p_i$  was the relative abundance of the  $i$ th OTU.

1-4. Simpson diversity ( $D_{Simpson}$ ) was calculated by  $1-D$ , where  $D = \sum p_i^2$  was the estimated probability of two random OTUs from a community (sample) belonged to the same taxonomy unit.

1-5. Shannon evenness,  $E_{Shannon} = D_{Shannon}/\ln(S)$  .

1-6. Simpson evenness,  $E_{Simpson} = D_{Simpson}/S$  .

1-7. Morisita-Horn similarity (overlap) index is defined by  $S_{MH} = 1 - \frac{\sum_{i=1}^S (p_{i1} - p_{i2})^2}{\sum_{i=1}^S p_{i1}^2 + \sum_{i=1}^S p_{i2}^2}$

whereas Morisita-Horn dissimilarity measure is the complementary form,

$$\frac{\sum_{i=1}^S (p_{i1} - p_{i2})^2}{\sum_{i=1}^S p_{i1}^2 + \sum_{i=1}^S p_{i2}^2} .$$

## SECTION 2. Supplementary Tables

**Table S1.** Sample sequence metrics

| Characteristics        | No. subjects | No. samples | Sequence  |                  |                |                 | Unique OTU <sup>a</sup> |         |                  |
|------------------------|--------------|-------------|-----------|------------------|----------------|-----------------|-------------------------|---------|------------------|
|                        |              |             | Total N   | Per subject Mean | Per subject SD | Per sample Mean | Per sample SD           | Total N | Singletons n (%) |
| Total                  | 4            | 24          | 1,958,527 | 489,631.8        | 40,213.6       | 81,605          | 19,454                  | 341     | 27 (7.9%)        |
| Timing                 |              |             |           |                  |                |                 |                         |         |                  |
| pre-treatment          | 4            | 4           | 327,964   | 81,991.0         | 11,900.0       | 81,991          | 11,900                  | 254     | 15 (5.9%)        |
| Post-treatment         | 4            | 20          | 1,630,563 | 407,640.8        | 45,719.8       | 81,528          | 20,874                  | 298     | 12 (4.0%)        |
| Pre-treatment carriage |              |             |           |                  |                |                 |                         |         |                  |
| Negative               | 1            | 6           | 497,381   | 497,381          | -              | 82,897          | 19,231                  | 239     | 8 (3.3%)         |
| Positive               | 3            | 18          | 1,461,146 | 487,048.7        | 48,843.3       | 81,175          | 20,061                  | 310     | 19 (6.1%)        |

Abbreviations: OTU, operational taxonomy unit; SL, similarity level; SD ,standard deviation

a. Including uncharacterised taxa with unknown or temporary taxonomic names

**Table S2.** Temporal changes in the relative abundance of most-changed OTUs ( $\geq 2\%$ ) with relative abundance by pre-treatment nasal carriage status

| <b>Non-carrier (N=1)</b>             | T0     | T1     | T2     | T3     | T4     | T5     |
|--------------------------------------|--------|--------|--------|--------|--------|--------|
| Oxalobacteraceae family <sup>a</sup> | 72.95% | 49.84% | 0.46%  | 2.08%  | 0.44%  | 1.60%  |
| Propionibacterium acnes              | 6.87%  | 19.91% | 12.17% | 36.80% | 13.79% | 39.72% |
| Corynebacterium genus                | 13.81% | 3.69%  | 77.60% | 54.78% | 72.98% | 32.57% |
| Corynebacterium kroppenstedtii       | 0.03%  | 0.04%  | 0.06%  | 0.03%  | 10.65% | 9.19%  |
| Moraxellaceae family <sup>a</sup>    | 0.95%  | 0.55%  | 0.21%  | 0.06%  | 0.09%  | 7.80%  |
| Neisseriaceae family <sup>a</sup>    | 0.12%  | 0.81%  | 0.28%  | 2.34%  | 0.08%  | 3.47%  |
| Others                               | 5.25%  | 25.15% | 9.23%  | 3.91%  | 1.97%  | 5.66%  |
| <b>Carriers (N=3)</b>                |        |        |        |        |        |        |
| Oxalobacteraceae family <sup>a</sup> | 0.54%  | 81.20% | 14.12% | 44.05% | 1.09%  | 25.75% |
| Staphylococcus aureus                | 14.02% | 0.07%  | 0.06%  | 0.93%  | 0.31%  | 0.05%  |
| Bacillaceae family                   | 26.33% | 0.90%  | 14.23% | 7.66%  | 19.43% | 17.12% |
| Corynebacterium genus                | 28.82% | 3.14%  | 38.30% | 21.28% | 26.87% | 23.14% |
| Streptococcus genus                  | 3.45%  | 0.03%  | 0.92%  | 0.19%  | 1.68%  | 0.17%  |
| Propionibacterium acnes              | 8.67%  | 3.04%  | 7.39%  | 9.57%  | 23.21% | 5.41%  |
| Staphylococcus epidermidis           | 8.46%  | 0.28%  | 3.11%  | 2.59%  | 5.26%  | 6.03%  |
| Acinetobacter genus                  | 0.08%  | 1.61%  | 1.68%  | 0.43%  | 0.17%  | 2.12%  |
| Others                               | 9.62%  | 9.72%  | 20.20% | 13.31% | 21.98% | 20.21% |

a. Gram-negative bacteria

**Table S3.** Community diversity estimates based on 10 rarefied data subsampled at the minimum sequence read of 41,698<sup>a</sup>

| All                    | Community richness |                     | Community diversity |                    | Community evenness |                      |
|------------------------|--------------------|---------------------|---------------------|--------------------|--------------------|----------------------|
|                        | Observed OTU       | Chao1               | Shannon             | Simpson            | Shannon evenness   | Simpson evenness     |
| Overall                | 325 (323-327)      | 348.7±2.1           | 2.3679 <sup>b</sup> | 0.821 <sup>c</sup> | 0.409 <sup>d</sup> | 0.00252 <sup>e</sup> |
| Per sample             | 87 (75.5-101.5)    | 111.5 (99.1-132.8)  | 1.69 (1.20-1.87)    | 0.66 (0.46-0.76)   | 0.37 (0.27-0.41)   | 0.007 (0.006-0.008)  |
| Sampling time          |                    |                     |                     |                    |                    |                      |
| T0                     | 105.5 (96.5-143.5) | 127.6 (114.0-180.6) | 1.78 (1.39-2.06)    | 0.76 (0.59-0.79)   | 0.38 (0.30-0.42)   | 0.006 (0.005-0.007)  |
| Post-treatment         | 82 (74-95)         | 108.6 (94.2-128.0)  | 1.58 (1.20-1.87)    | 0.64 (0.45-0.71)   | 0.36 (0.27-0.41)   | 0.007 (0.006-0.009)  |
| T1                     | 75 (73-99)         | 102.3 (89.8-144.4)  | 1.33 (0.83-1.71)    | 0.45 (0.27-0.59)   | 0.31 (0.19-0.38)   | 0.006 (0.004-0.006)  |
| T2                     | 81 (62.5-100.5)    | 110.3 (88.8-141.4)  | 1.39 (0.82-2.32)    | 0.50 (0.33-0.75)   | 0.31 (0.19-0.53)   | 0.007 (0.005-0.009)  |
| T3                     | 82 (73.5-95.5)     | 113.9 (95.0-139.1)  | 1.64 (1.31-1.77)    | 0.62 (0.55-0.69)   | 0.38 (0.30-0.40)   | 0.008 (0.007-0.009)  |
| T4                     | 84.5 (77.5-94.0)   | 111.7 (104.3-120.8) | 1.66 (1.14-1.95)    | 0.72 (0.55-0.79)   | 0.37 (0.26-0.43)   | 0.008 (0.007-0.009)  |
| T5                     | 90 (75-95)         | 104.6 (99-116.9)    | 1.69 (1.46-2.28)    | 0.69 (0.62-0.80)   | 0.37 (0.34-0.50)   | 0.008 (0.007-0.010)  |
| Pre-treatment carriage |                    |                     |                     |                    |                    |                      |
| Non-carrier            | 101 (92-119.5)     | 128.3 (114.0-149.7) | 1.08 (1.02-1.64)    | 0.50 (0.44-0.71)   | 0.24 (0.21-0.35)   | 0.006 (0.005-0.006)  |
| Carriers <sup>b</sup>  | 82 (74-92.5)       | 106.7 (93.1-125.0)  | 1.75 (1.38-1.94)    | 0.67 (0.53-0.78)   | 0.39 (0.32-0.42)   | 0.008 (0.007-0.009)  |

Abbreviations: IQR, inter-quartile range; OTU, operational taxonomic unit; S. aureus, Staphylococcus aureus; SE, standard error

a. All expressed as median (IQR)

b. SE=0.00015

c. SE=0.00025

d. SE=0.00025

e. SE=7.5E-06

**Table S4.** Diversity estimates for the community composition of the nasal microbiota at each post-decolonisation visit, median (IQR)

|               | No. Samples | Community richness |                     | Community diversity |                  | Community evenness |                     |
|---------------|-------------|--------------------|---------------------|---------------------|------------------|--------------------|---------------------|
|               |             | Observed OTU       | Chao1               | Shannon             | Simpson          | Shannon evenness   | Simpson evenness    |
| Sampling time |             |                    |                     |                     |                  |                    |                     |
| T1            | 4           | 79.5 (75.8-92.5)   | 101.3 (96.3-116.7)  | 1.33 (1.06-1.54)    | 0.45 (0.35-0.53) | 0.31 (0.19-0.37)   | 0.006 (0.004-0.006) |
| T2            | 4           | 90.0 (77.8-108.8)  | 125.0 (110.3-139.5) | 1.39 (0.92-2.04)    | 0.50 (0.36-0.69) | 0.30 (0.18-0.52)   | 0.006 (0.004-0.008) |
| T3            | 4           | 86.0 (77.0-100.0)  | 125.6 (110.8-140.0) | 1.63 (1.41-1.76)    | 0.62 (0.56-0.68) | 0.37 (0.29-0.40)   | 0.007 (0.006-0.008) |
| T4            | 4           | 98.5 (95.5-104.8)  | 119.8 (113.5-126.9) | 1.66 (1.26-1.94)    | 0.72 (0.60-0.78) | 0.36 (0.25-0.42)   | 0.007 (0.005-0.008) |
| T5            | 4           | 93.0 (85.3-100.8)  | 112.3 (103.5-125.1) | 1.69 (1.55-2.01)    | 0.69 (0.64-0.76) | 0.36 (0.33-0.50)   | 0.008 (0.006-0.009) |

Abbreviations: OTU, operational taxnomony unit; IQR, interquartile range

**Table S5.** Results of differential expression analysis on OTUs by levels of HBD3 and HNP1, respectively, among healthy staphylococcal carriers following mupirocin decontamination

| AMP  | baseMean | log2FoldChange | lfcSE  | padj    | Family             | Genus            | Species        |
|------|----------|----------------|--------|---------|--------------------|------------------|----------------|
| HBD3 | 835.648  | -1.331         | 0.276  | 0.00015 | Corynebacteriaceae | Corynebacterium  | kroppenstedtii |
|      | 67.736   | -0.881         | 0.220  | 0.00212 | Gordoniaceae       | Gordonia         | NA             |
|      | 14.776   | -1.142         | 0.281  | 0.00212 | Campylobacteraceae | Sulfurospirillum | NA             |
| HNP1 | 835.6480 | 1.4004         | 0.2322 | 0.00000 | Corynebacteriaceae | Corynebacterium  | kroppenstedtii |
|      | 145.4689 | -0.7110        | 0.1837 | 0.00427 | Staphylococcaceae  | Staphylococcus   | NA             |
|      | 84.0515  | -0.7674        | 0.2002 | 0.00427 | Caulobacteraceae   | NA               | NA             |
|      | 364.3767 | 0.7949         | 0.2026 | 0.00427 | Moraxellaceae      | NA               | NA             |

Abbreviations: HBD3, human beta-defensin 3; HNP1, human neutrophil peptide 1; lfc, log2-fold change; SE, standard error; padj, P-values adjusted for multiple testing using Benjamini-Hochberg correction; NA, unclassified

**SESECTION 3. Supplementary Figures**

**Figure S1.** Comparing the observed OTU number with that obtained by rarefying the sequence data with the minimum sequence read of each sample (a). Comparing the cumulative number of OTU observed in the current study with those obtained by using sequence read ("individual")-based and sample-based[4] rarefaction (b).

(a)

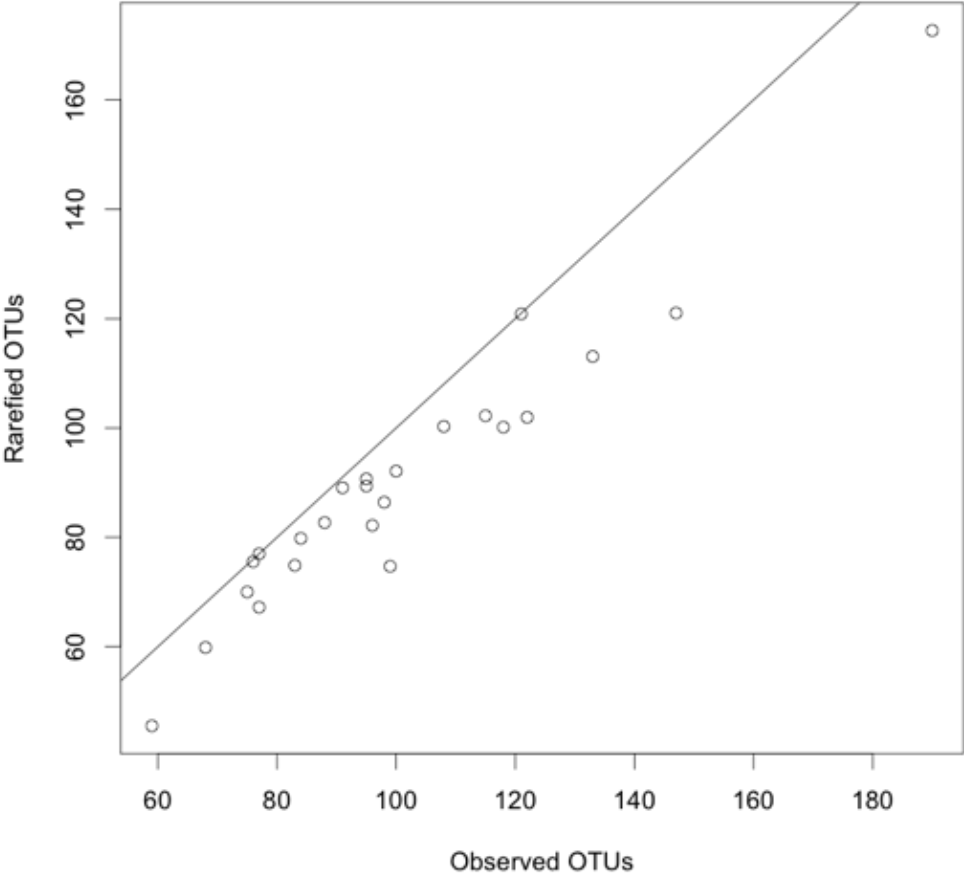



(b)

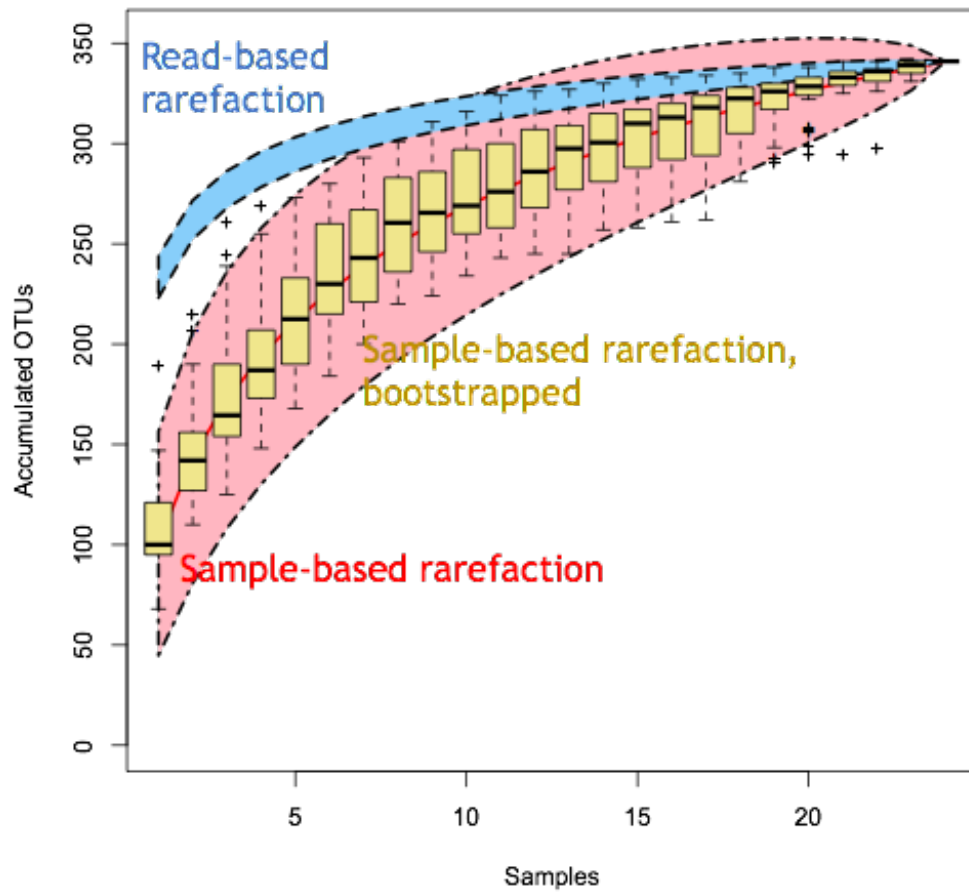

**Figure S2.** Linear correlation between the original dissimilarity metric (Morisita-Horn) and MDS-transformed distance.

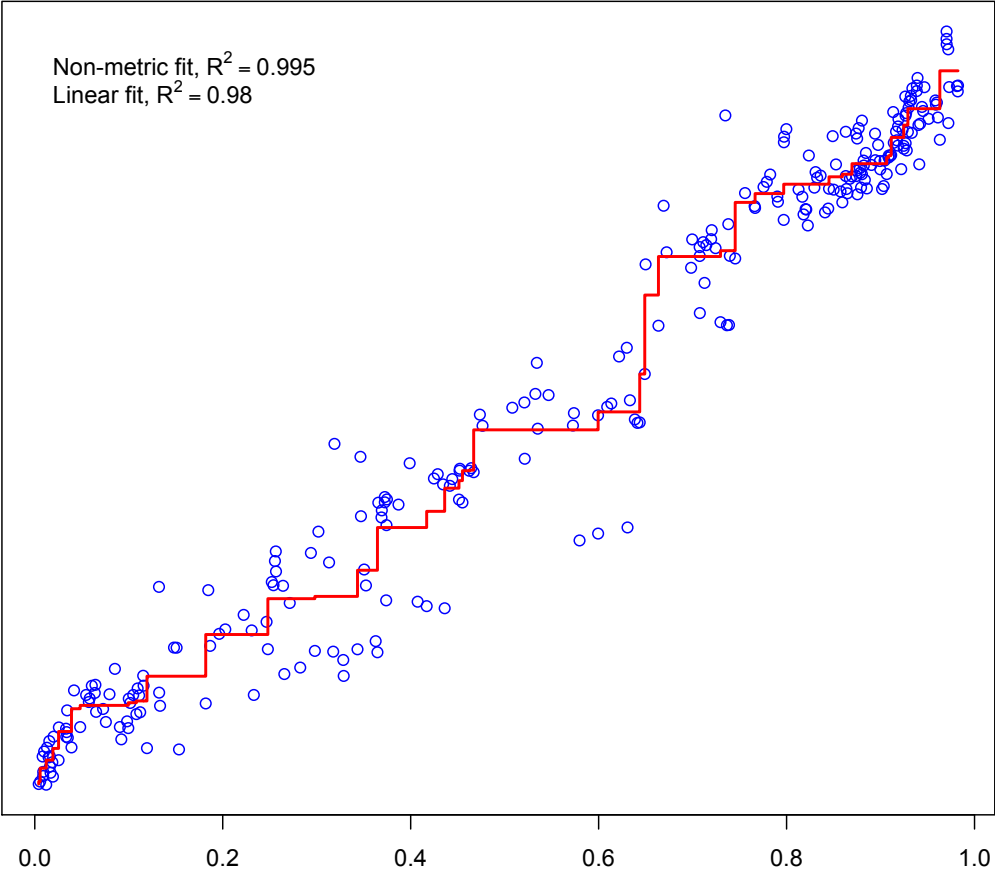

**Figure S3.** Samples clustered by two major axes using constrained correspondence analysis (CCA) without specifying "environmental" variables in the model yet (the "null" model). (pre\_carrier: the initial carriage status- yes versus no)

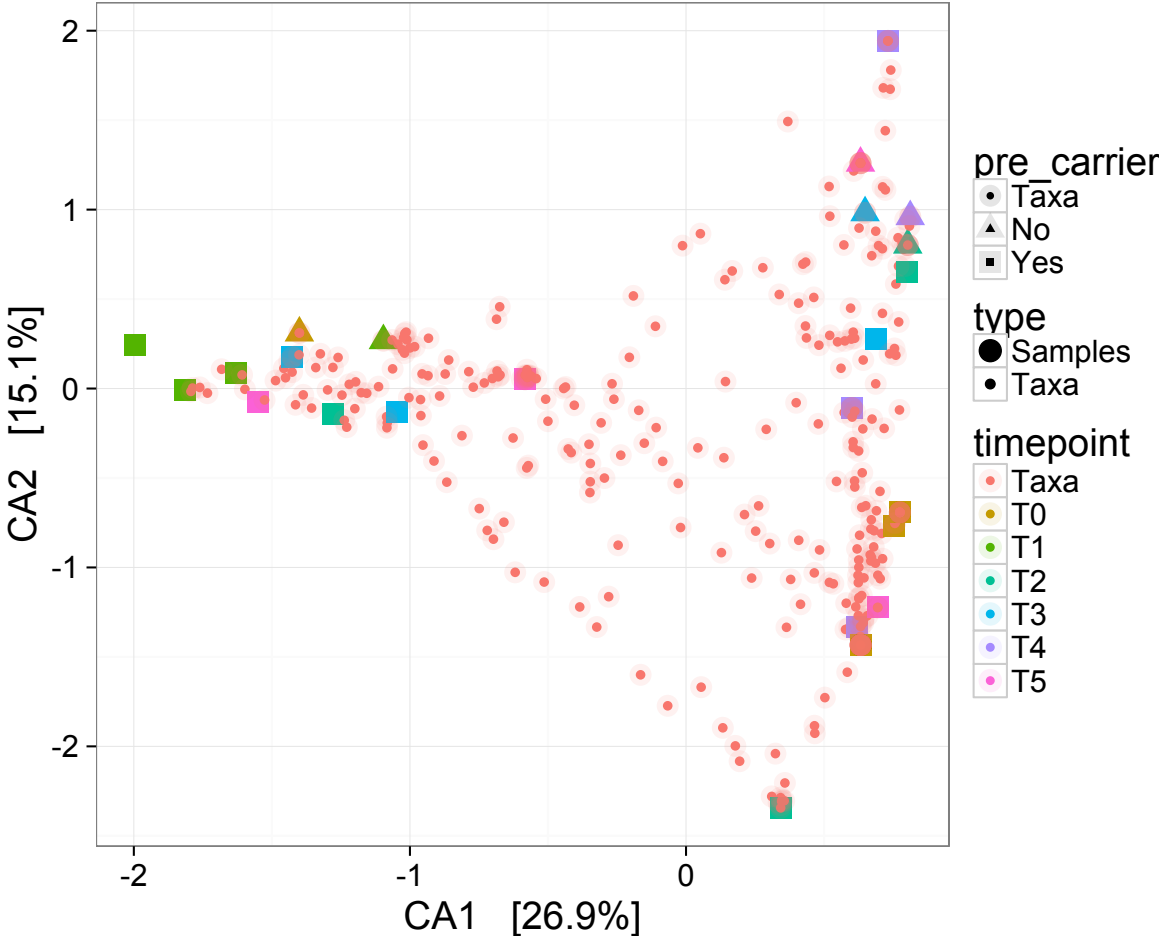

**Figure S4.** Samples clustered by two major axes using nonmetric multidimensional scaling (NMDS) methods, overlaid with "environmental" variables including staphylococcal carriage status before decolonisation ("Pre-trt carrier"), antimicrobial HNP1 levels, and sampling time (as a continuous covariate).

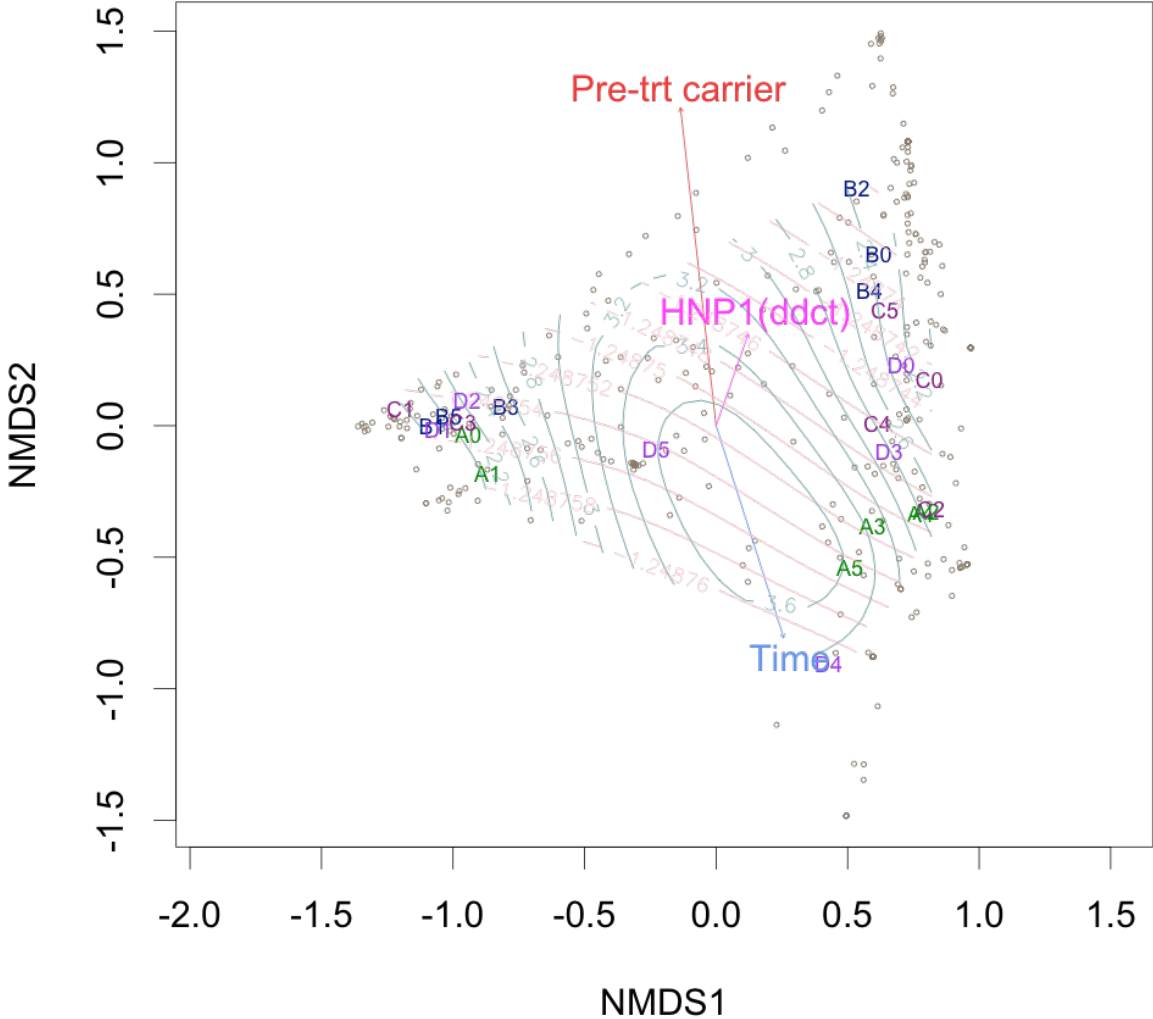

## REFERENCES

1. Biodiversity: frontiers in measurement and assessment. United States: Oxford University Press, **2011**.
2. Chao A, Ma KH, Hsieh TC. SpadeR: Species Prediction and Diversity Estimation with R. R package version 0.1.0., **2015**.
3. Oksanen J, Guillaume B, Kindt R, et al. vegan: Community Ecology Package. R package version 2.3-5., **2016**.
4. Chao A, Gotelli NJ, Hsieh TC, et al. Rarefaction and extrapolation with Hill numbers: a framework for sampling and estimation in species diversity studies. *Ecol Monogr* **2014**; 84(1): 45-67.
